# Supplementary material for: METTL1-mediated m7G tRNA modification drives papillary thyroid cancer progression and metastasis by regulating the codon-specific translation of TNF-α
Source: Springer Nature journal article supplement (doi:10.1038/s41419-025-07716-8), 2025-05-13
Supplement: MOESM1 [file 41419_2025_7716_MOESM1_ESM.pdf]

**Supplementary material for**

**METTL1-mediated m7G tRNA modification drives papillary thyroid  
cancer progression and metastasis by regulating codon-specific  
translation of TNF- $\alpha$**

Weiwei Li, et al.

Contents:

6 Supplementary Figures and Legends

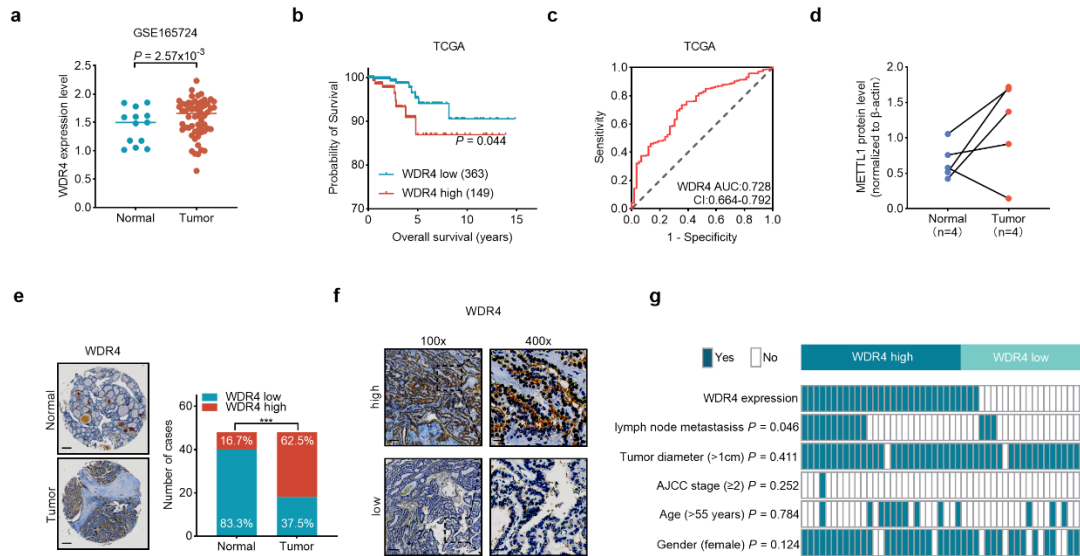

**Fig. S1. METTL1 expression is high in PTC, and this phenotype is associated with a poor prognosis, related to Fig. 1.** a) WDR4 mRNA levels in PTC tumorous tissues and adjacent normal tissues in a GEO dataset, GSE165724. b) Overall survival (OS) was compared between PTC patients with high WDR4 level (TPM  $\geq 11.329$ ) and low WDR4 level (TPM  $< 11.329$ ) in TCGA cohort. Log-rank test. c) Receiver operating characteristic (ROC) analysis for overall survivals was conducted based on the WDR4 mRNA expression in TCGA cohort. A cut-off value of 3.647 for WDR4  $\log_2(\text{TPM}+1)$  with a specificity of 0.644 and sensitivity of 0.734. d) Statistical analysis of METTL1 protein levels in 5 representative paired PTC tumorous tissues and adjacent normal tissues, related to Figure 1d. e) Representative images and semiquantitative analysis of immunohistochemistry (IHC) staining for WDR4 in a tissue microarray (TMA) with 48 cases of paired PTC tumorous and non- tumorous tissues. Chi-square test, \*\*\* $P < 0.001$ . scale bars = 200 $\mu$ m (50 $\times$ ). f) Representative images of immunohistochemistry (IHC) staining for WDR4 protein in 48 cases of PTC tumorous tissues. Scale bar = 100 $\mu$ m (100 $\times$ ) or 25 $\mu$ m (400 $\times$ ). g) Comparing the characteristics of lymph node metastasis, tumor diameter, AJCC stage, age, and gender between PTC patients with WDR4 high-expression (n = 30) and low-expression (n = 18). Chi-square test, the  $P$  value as indicated.

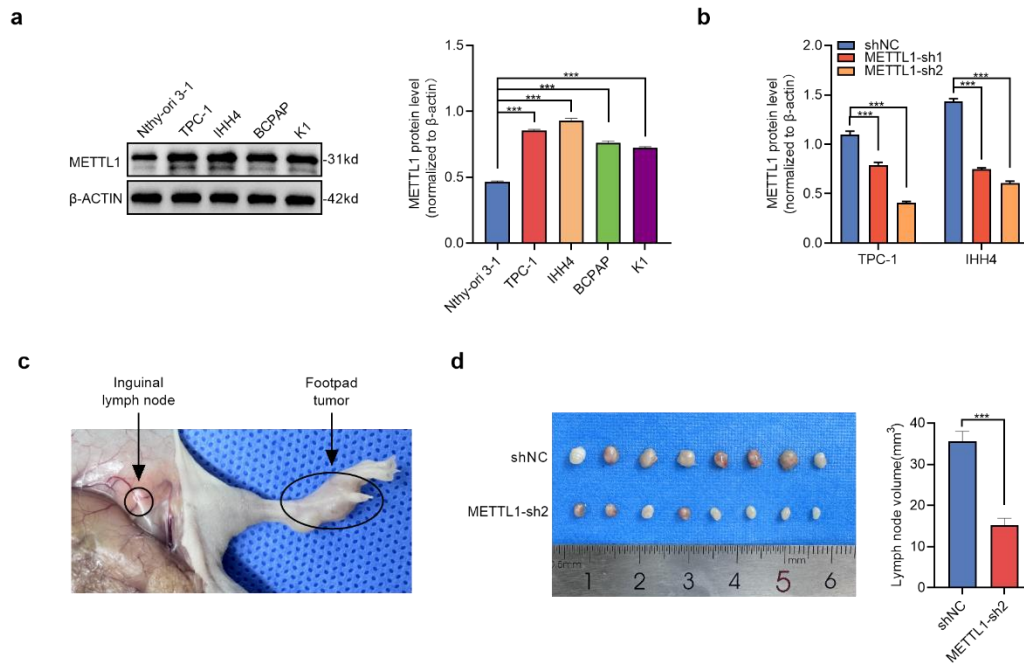

**Fig. S2. METTL1 promotes PTC cell proliferation and metastasis in a manner dependent on its tRNA methyltransferase activity, related to Fig. 2.** a) Western blot and quantitation analysis to compare METTL1 expression in normal thyroid cells (Nthy-ori 3-1) and PTC cells (TPC-1, IHH4, BCPAP and K1). b) Statistical analysis of METTL1 protein levels in TPC-1 and IHH4 cells stably transfected with METTL1-shRNAs (METTL1-sh) or control shRNA (shNC), related to Fig. 2b. c) An inguinal lymph node metastasis model was established by inoculating the foot pads of nude mice with K1 cells. d) Representative image and quantification of the volume of the inguinal lymph nodes (n = 8). Two tailed unpaired student's t-tests in (a, b, d), \*\*\* $P$ <0.001.

**a**

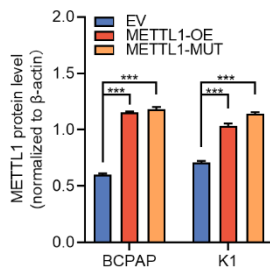

**Fig. S3. METTL1 promotes PTC cell proliferation and metastasis in a manner dependent on its tRNA methyltransferase activity, related to Fig. 3.** a) Statistical analysis of METTL1 protein levels in BCPAP and K1 cells stably transfected with METTL1 wild-type construct (METTL1-WT), catalytic mutation construct (METTL1-MUT), or empty vector (EV), related to Fig. 3a. Two tailed unpaired Student's t test, \*\*\* $P < 0.001$ .

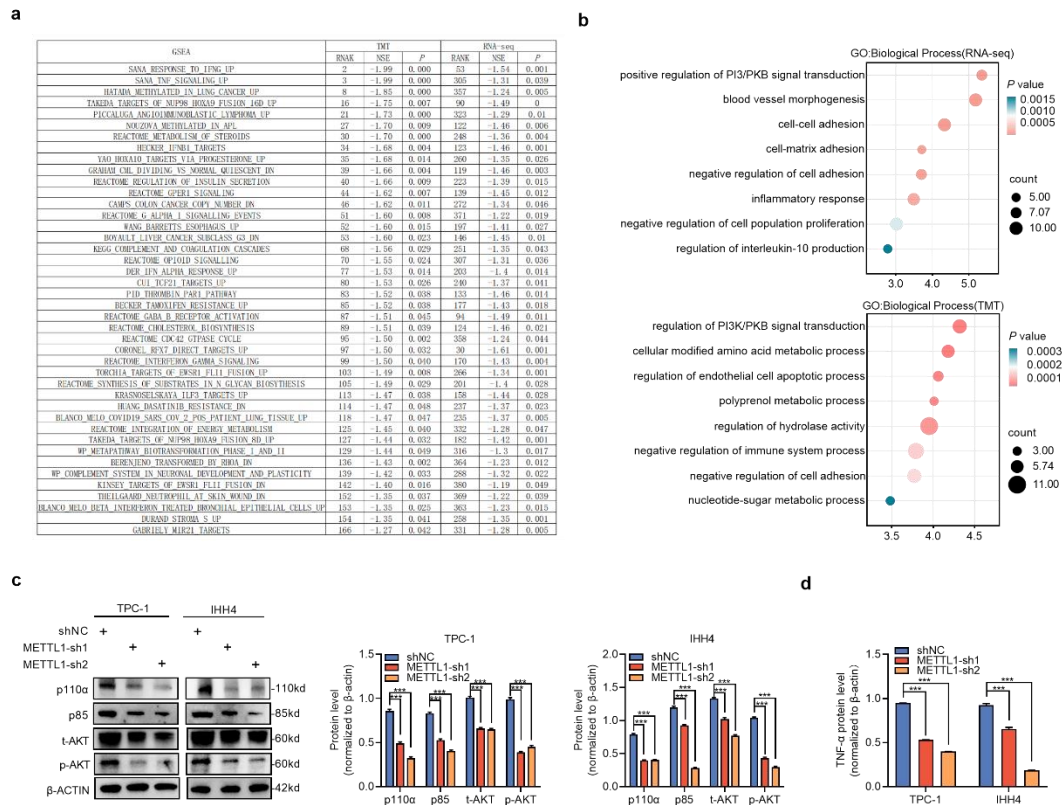

**Fig. S4. METTL1 regulates TNF- $\alpha$  expression at the posttranscriptional level, related to Fig. 4.**

**4. a)** Table listing the 42 overlapped pathways identified by GSEA between Tandem Mass Tags (TMT) and RNA sequencing (RNA-seq) results. **b)** Gene Ontology (GO) analysis was conducted to show the enriched biological process of RNA-seq (upper) and TMT (lower). **c)** Western blot and statistical analysis of the total p110 $\alpha$ , p85, AKT protein and phosphorylated AKT protein. **d)** Statistical analysis of TNF- $\alpha$  protein levels in TPC-1 and IHH4 cells stably transfected with METTL1-shRNAs (METTL1-sh) or control shRNA (shNC), related to Fig. 4i. Two tailed unpaired Student's t test in (c, d), \*\*\* $P$ <0.001.

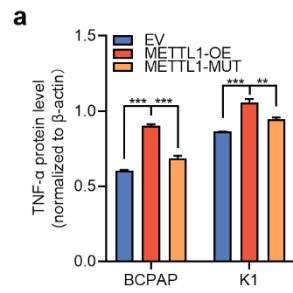

**Fig. S5. METTL1-mediated m7G tRNA modification regulates the codon-specific translation of TNF- $\alpha$ , related to Fig. 5.** a) Statistical analysis of TNF- $\alpha$  protein levels in BCPAP and K1 cells stably transfected with METTL1 wild-type construct (METTL1-WT), catalytic mutation construct (METTL1-MUT), or empty vector (EV)., related to Fig. 5n. Two tailed unpaired Student's t test, \*\* $P$ <0.01, \*\*\* $P$ <0.001.

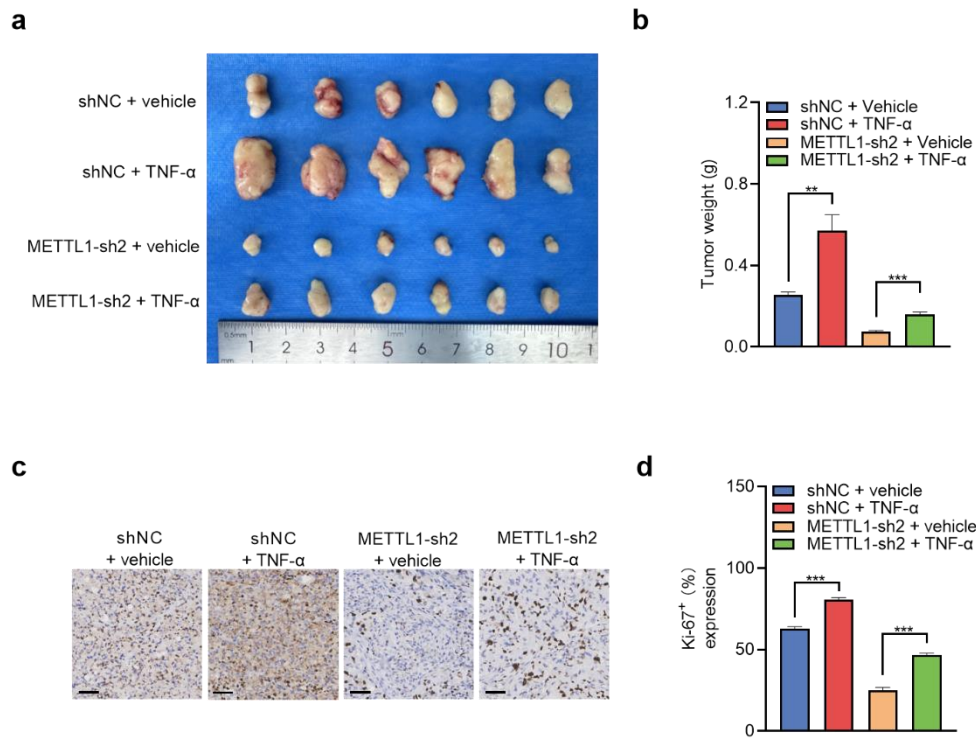

**Fig. S6. TNF- $\alpha$  is essential for METTL1-driven progression and metastasis, related to Fig. 6.**

a) Subcutaneous xenografts of nude mice treated with vehicle and Recombinant TNF- $\alpha$  (50  $\mu$ g/kg) in METTL1-knockdown and control K1 cells (n = 6). b) Tumor weight of xenograft tumors. c, d) Representative immunohistochemistry (IHC) staining images (c) and semiquantitative analyses (d) of Ki-67 of subcutaneous xenograft of nude mice treated with vehicle and Recombinant TNF- $\alpha$  (50  $\mu$ g/kg) in METTL1-knockdown and control K1 cells. Scale bar = 50 $\mu$ m. Two tailed unpaired Student's t test in (b, d), \*\* $P$ <0.01, \*\*\* $P$ <0.001.
